# Supplementary material
Source: MDPI journal article supplement (https://www.mdpi.com/2077-0472/13/6/1109)
Supplement: s1 [file s1]

## Supplementary

**Table S1.** Chemical composition of dried roots-stems obtained from *Eupatorium adenophorum* with headspace at two temperature and four week.

| Compound                | Time  | Temperature (°C) |        |        |        |        |        |        |        |        |
|-------------------------|-------|------------------|--------|--------|--------|--------|--------|--------|--------|--------|
|                         |       | Control          | 25     |        |        |        | 35     |        |        |        |
|                         |       |                  | 1 week | 2 week | 2 week | 4 week | 1 week | 2 week | 2 week | 4 week |
| Butanol                 | 2.79  | 3.5              | 4.1    | 4.35   | 7.47   | 1.36   | 5.77   | 9.91   | 1.46   | 1.39   |
| Furan, 2,5-dimethyl     | 3.30  | 0.7              | 0.57   | 0.54   | 1.03   | 1.24   | 0.6    | 0.64   | 1.067  | 1.018  |
| $\alpha$ -Pinene        | 10.03 | 0.2              | 0.21   | 0.22   | 0.43   | 0.45   | 0.23   | 0.24   | 0.33   | 0.38   |
| Camphene                | 10.20 | 1.4              | 1.65   | 1.11   | 1.45   | 1.31   | 1.75   | 1.35   | 1.69   | 1.71   |
| Butanoic acid           | 10.25 | 5.42             | 6.35   | 9.32   | 1.65   | 0.37   | 8.97   | 11.05  | 1.41   | 0.39   |
| Propanoic acid          | 10.94 | 1.1              | 1.8    | 2.13   | 0.83   | 0.91   | 1.89   | 2.73   | 0.43   | 0.21   |
| Bicyclo-methylene       | 13.02 | 2.32             | 2.61   | 4.47   | 5.79   | 4.39   | 2.71   | 3.87   | 6      | 5.07   |
| Carene                  | 13.08 | 5.15             | 5.01   | 4.91   | 5.02   | 4.36   | 4.32   | 3.64   | 4.07   | 4.65   |
| Alpha-Phellandrene      | 13.40 | 1.98             | 1.35   | 1.15   | 1.52   | 0.97   | 1.45   | 0.91   | 1.02   | 0.95   |
| 4,8-Dimethylnona-triene | 13.56 | 1.1              | 1.35   | 2.45   | 2.68   | 2.24   | 1.62   | 1.78   | 2.54   | 1.97   |
| Methylethylbenzene      | 13.68 | 34.1             | 35.67  | 30.1   | 30.49  | 41.49  | 31.2   | 30.69  | 40.24  | 35.35  |
| o-Cymene                | 14.29 | 33.04            | 34.3   | 34.62  | 36     | 31     | 34.68  | 31.3   | 32.3   | 43.35  |
| D-Limonene              | 14.52 | 0.25             | 0.29   | 0.33   | 0.84   | 1.63   | 0.31   | 0.38   | 1.67   | 0.76   |
| Alpha-Bergamotene       | 33.87 | 0.59             | 0.42   | 0.28   | 0.22   | 0.2    | 0.38   | 0.25   | 0.18   | 0.14   |
| (E)-Beta-Farnesene      | 35.62 | 0.14             | 0.18   | 0.2    | 0.21   | 0.2    | 0.18   | 0.21   | 0.22   | 0.22   |

The amount of main compounds identified in the table is in %.

**Table S2.** Chemical composition of dried leaves obtained from *Eupatorium adenophorum* with headspace at two temperature and four week.

| Compound                   | Time  | Temperature (°C) |        |        |        |        |        |        |        |        |
|----------------------------|-------|------------------|--------|--------|--------|--------|--------|--------|--------|--------|
|                            |       | Control          | 25     |        |        |        | 35     |        |        |        |
|                            |       |                  | 1 week | 2 week | 2 week | 4 week | 1 week | 2 week | 2 week | 4 week |
| Methylene chloride         | 2.58  | 5.1              | 5.87   | 6.37   | 7.02   | 7.18   | 5.3    | 6.05   | 6.28   | 6.58   |
| Butanal                    | 2.79  | 4.32             | 3.94   | 3.23   | 2.1    | 1.9    | 4.21   | 4.1    | 3.87   | 3.13   |
| Alpha-Pinene               | 10.03 | 1.9              | 1.65   | 1.55   | 0.63   | 0.53   | 1.78   | 0.79   | 0.75   | 0.39   |
| Camphene                   | 10.20 | 4.9              | 5.2    | 6      | 6.45   | 6.98   | 4.98   | 5.2    | 5.1    | 5.2    |
| Cyclohexene                | 13.02 | 0.83             | 1.58   | 1.92   | 2.4    | 2      | 1.48   | 1.55   | 1.68   | 1.29   |
| Carene                     | 13.08 | 1.83             | 2.63   | 2.87   | 4.78   | 4.91   | 1.99   | 2.36   | 3.6    | 3.8    |
| Alpha-Phellandrene         | 13.40 | 1.1              | 1.2    | 1.42   | 0.86   | 0.92   | 1.19   | 1.42   | 1.22   | 1.12   |
| Benzene methyl             | 14.25 | 3.29             | 3.18   | 2.41   | 2.4    | 2.75   | 2.22   | 2.75   | 2.45   | 3.1    |
| o-Cymene                   | 14.29 | 4.42             | 5.07   | 4.36   | 4.02   | 2.83   | 4.1    | 3.9    | 3.2    | 3.4    |
| Linalool                   | 17.37 | 0.53             | 1.46   | 1.5    | 1.57   | 1.87   | 0.76   | 1.0    | 1.22   | 0.87   |
| Nonanal                    | 21.61 | 2.18             | 2.24   | 3.81   | 3.92   | 4.1    | 2.42   | 2.53   | 2.92   | 3.21   |
| Alpha-Terpineol            | 21.83 | 0.52             | 0.49   | 0.45   | 0.41   | 0.37   | 0.49   | 0.43   | 0.42   | 0.4    |
| Alpha-Bergamotene          | 33.87 | 2.79             | 4.55   | 4.8    | 5.74   | 5.86   | 3.26   | 3.62   | 3.53   | 4.67   |
| Caryophyllene              | 33.92 | 2.43             | 1.45   | 2.92   | 2.76   | 2.66   | 3.28   | 5.18   | 3.39   | 3.02   |
| Bicyclo dimethyl methylene | 34.18 | 12.3             | 9.12   | 12.78  | 13.18  | 12.75  | 10.74  | 9.37   | 13.52  | 11.26  |
| Beta-Famesene              | 35.62 | 2.2              | 2.01   | 1.8    | 1.64   | 1.39   | 2.19   | 2.09   | 1.75   | 1.75   |
| Zonarene                   | 35.97 | 2.2              | 1.97   | 2.82   | 2.86   | 1.69   | 2.6    | 3.13   | 1.65   | 1.72   |
| Beta-Bisabolene            | 37.26 | 5.23             | 6.24   | 6.45   | 5.61   | 5.43   | 4.72   | 5      | 4.9    | 7.1    |
| Caryophyllene oxide        | 41.42 | 1.79             | 1.52   | 0.84   | 0.65   | 0.67   | 1.61   | 1.32   | 1.062  | 0.98   |
